# Supplementary material for: The Association between Plant-Based Diet Indices and Metabolic Syndrome in Chinese Adults: Longitudinal Analyses from the China Health and Nutrition Survey
Source: MDPI journal article supplement (doi:10.3390/nu15061341), 2023-03-09
Supplement: s1 [file s1]

# Supplementary data

**Supplementary Table S1.** The classification of food items in the China Health and Nutrition Survey (CHNS).

| <i>Plant Food Groups</i> |                                                                                                                                                               | <i>Food Codes (FD)</i>                                                                                                         |
|--------------------------|---------------------------------------------------------------------------------------------------------------------------------------------------------------|--------------------------------------------------------------------------------------------------------------------------------|
| <i>Healthy</i>           |                                                                                                                                                               |                                                                                                                                |
| Whole grains             | Wheat, wheat germ flour, bran, black rice, brown rice, corn, barley, millet, yellow rice, cereal, oatmeal                                                     | 011101 =<FD=< 011208 or<br>012001=<FD=<012306 or<br>013101 =<FD=<013201 or<br>014101 =<FD=<019014 or<br>FD=152102 or FD=152103 |
| Fruits                   | kernel fruits, berry fruit, citrus, tropical and subtropical fruits, melon, fruit juice, melons                                                               | 061101=<FD=<066206 or<br>162001 =<FD=<162028                                                                                   |
| Vegetables               | Root vegetables, fresh beans, eggplant, garlic and onion, young stems and leaves, aquatic vegetables, potatoes and taro, wild vegetables, mushrooms and algae | 041101=<FD=<048088 or<br>051001=<FD=<052011 or<br>021201=<FD=<021301                                                           |
| Nuts                     | Peanuts/almonds/pine nuts                                                                                                                                     | 071001=<FD=<072026                                                                                                             |
| Legumes                  | Non- fermented bean products : tofu, soy milk powder, mung bean, red bean, broad bean, other beans                                                            | 031101=<FD=<039902                                                                                                             |
| Tea and coffee           | Coffee, tea                                                                                                                                                   | 166101=<FD=<166202 or<br>167016=<FD=<167018                                                                                    |
| <i>Less healthy</i>      |                                                                                                                                                               |                                                                                                                                |
| Refined grains           | Noodles, white rice, bread, biscuits, and other leisure foods, flour, instant noodles, starch, rice cake/rice cake soup, other rice cakes                     | 011301=<FD=<011503 or<br>012401=<FD=<012411 or                                                                                 |

|                                  |                                                                                                     |                                                                                                                              |
|----------------------------------|-----------------------------------------------------------------------------------------------------|------------------------------------------------------------------------------------------------------------------------------|
|                                  |                                                                                                     | FD=0132202 or FD=019201 or FD=152101 or<br>152104=<FD=<153002 or FD=153004 or<br>141001=<FD=<141037 or<br>022101=<FD=<022203 |
| Potatoes                         | Potatoes, chips                                                                                     | 021101=<FD=<021108 or FD=153003                                                                                              |
| Sugar sweetened beverages        | Carbonated beverages, solid beverages, milk beverages, plant<br>protein beverages, other beverages. | 161001 =< FD=161008 or<br>163001=<FD=<165002 or<br>167001=<FD=<169013                                                        |
| Sweets and desserts              | Cakes, desserts, mooncakes, sugars, preserves                                                       | 142101=<FD=<142333 or<br>181001=<FD=<184005                                                                                  |
| Fermented food group             | Bean sauce, peanut butter, salted vegetable, pickled vegetable<br>(preserved in soy sauce or salt)  | 203101=<FD=<205048                                                                                                           |
| <b><i>Animal Food Groups</i></b> |                                                                                                     |                                                                                                                              |
| Animal fat                       | Animal(pig, cattle and sheep) oils and fats                                                         | 191001=<FD=<191007                                                                                                           |
| Dairy                            | Milk, yogurt/yoplait, ice cream, cheese                                                             | 101101=<FD=<109009                                                                                                           |
| Eggs                             | Eggs/quail eggs                                                                                     | 111101=<FD=<114201                                                                                                           |
| Fish                             | Fish, shrimp, crab, shellfish and mollusc                                                           | 121101=<FD=<129302                                                                                                           |
| Meat                             | Subclasses of pig, sheep, donkey, horse, poultry, etc                                               | 081101=<FD=<089006 or 091101=<FD=<099004                                                                                     |

**Supplementary Table S2.** Hazard ratios (95% CI) of plant-based diet indices and incident MetS after multiple imputation.

|                | Quintile 1 | Quintile 2      | Quintile 3      | Quintile 4      | Quintile 5      | P-trend |
|----------------|------------|-----------------|-----------------|-----------------|-----------------|---------|
|                |            | hPDI            |                 |                 |                 |         |
| Crude model    | Reference  | 0.91(0.87,0.94) | 0.71(0.68,0.74) | 0.64(0.61,0.68) | 0.63(0.60,0.65) | <.0001  |
| Adjusted model | Reference  | 0.94(0.91,0.98) | 0.77(0.74,0.81) | 0.72(0.68,0.76) | 0.73(0.70,0.77) | <.0001  |
|                |            | uPDI            |                 |                 |                 |         |
| Crude model    | Reference  | 0.88(0.84,0.93) | 0.95(0.91,0.98) | 1.04(1.00,1.09) | 1.08(1.03,1.12) | <.0001  |
| Adjusted model | Reference  | 0.96(0.92,1.01) | 1.05(1.01,1.10) | 1.21(1.15,1.27) | 1.26(1.21,1.32) | <.0001  |

Adjusted model was adjusted for age, sex, total energy intake(d/kcal), total carbohydrate intake(g), total fat intake(g), total protein intake(g), education, physical activity, smoking status, and alcohol intake. hPDI, health plant-based diet index; uPDI, unhealthful plant-based diet index.

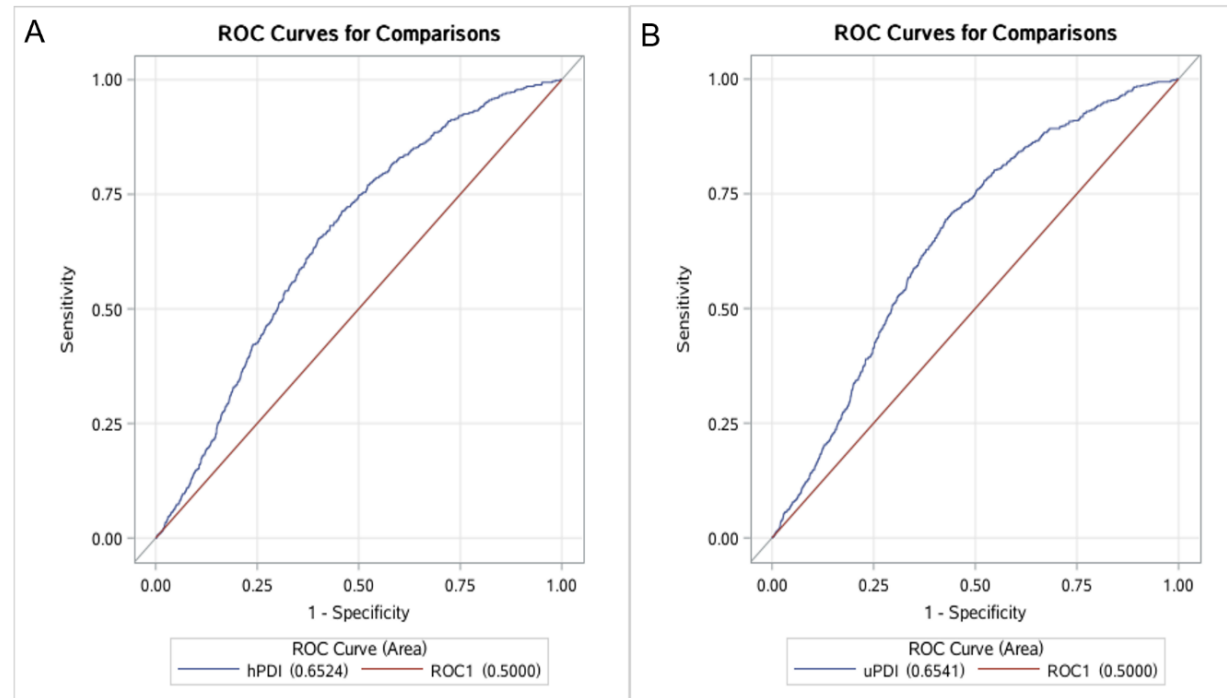

**Supplementary Figure S1.** The receiver operating characteristic curve (ROC) curves of hPDI (A) and uPDI (B). hPDI, healthful plant-based diet index; uPDI, unhealthful plant-based diet index.
